# Supplementary material for: Growth of centimeter-scale high-quality In2Se3 films for transparent, flexible and high performance photodetectors
Source: Royal Society of Chemistry journal article supplement (doi:10.1039/c6tc02296k), 2016-01-01
Supplement: c6tc02296k1.pdf [file c6tc02296k1.pdf]

## **Supporting Information for**

### **Centimeter-scale growth of high-quality In<sub>2</sub>Se<sub>3</sub> film for transparent, flexible and high performance photodetectors**

Z. Q. Zheng, J. D. Yao and G. W. Yang

*State Key Laboratory of Optoelectronic Materials and Technologies, Nanotechnology  
Research Center, School of Materials Science & Engineering, Sun Yat-sen University,  
Guangzhou 510275, Guangdong, P. R. China.*

**Table S1. Summary of performance parameters of recently developed 2D material-based photodetectors**

| Device<br>(substrate)<br>(Bandgap in eV)                                         | Fabrication<br>method     | Measurement<br>condition                                | Responsivity<br>(A/W) | EQE<br>(%) | Spectral<br>window | D*<br>(Jones)                            | Physical<br>characteristic | Ref. |
|----------------------------------------------------------------------------------|---------------------------|---------------------------------------------------------|-----------------------|------------|--------------------|------------------------------------------|----------------------------|------|
| <b>1L MoS<sub>2</sub></b><br>(on SiO <sub>2</sub> /Si)<br>(1.8, DB)              | Mechanical<br>exfoliation | 520 nm<br>V <sub>ds</sub> = 5 V                         | 1.17                  | 280        | Visible-<br>NIR    | 1.5 * 10 <sup>7</sup>                    | Rigid                      | 1    |
| <b>1L MoS<sub>2</sub></b><br>(on SiO <sub>2</sub> /Si)<br>(1.8, DB)              | Mechanical<br>exfoliation | V <sub>g</sub> = 50 V<br>V <sub>ds</sub> = 1 V          | 7.5*10 <sup>-3</sup>  | -          | Visible            | -                                        | Rigid                      | 2    |
| <b>ML MoS<sub>2</sub></b><br>(on SiO <sub>2</sub> /Si)<br>(1.2, IB)              | Mechanical<br>exfoliation | 633 nm<br>V <sub>g</sub> = 3 V<br>V <sub>ds</sub> = 1 V | 0.12                  | -          | Visible-<br>NIR    | 5*10 <sup>7</sup> --<br>10 <sup>11</sup> | Rigid                      | 3    |
| <b>Graphene</b><br>(on SiO <sub>2</sub> /Si)<br>(gapless)                        | Mechanical<br>exfoliation | 1550 nm<br>V <sub>g</sub> = 80 V                        | 5*10 <sup>-4</sup>    | 6-16       | UV-IR              | -                                        | Rigid                      | 4    |
| <b>FL GaSe</b><br>(on SiO <sub>2</sub> /Si)<br>(2.1, IB)                         | Mechanical<br>exfoliation | 254 nm<br>V <sub>ds</sub> = 5 V                         | 2.8                   | 1367       | UV                 | -                                        | Rigid                      | 5    |
| <b>ML WS<sub>2</sub></b><br>(on SiO <sub>2</sub> /Si)<br>(1.1, IB)               | PLD                       | 635 nm<br>V <sub>ds</sub> = 9 V                         | 0.51                  | 137        | UV-NIR             | 2.7*10 <sup>9</sup>                      | Rigid                      | 6    |
| <b>1L MoSe<sub>2</sub></b><br>(on SiO <sub>2</sub> /Si)<br>(1.56, DB)            | CVD                       | 532 nm<br>V <sub>ds</sub> = 10 V                        | 13*10 <sup>-3</sup>   | -          | Visible            | -                                        | Rigid                      | 7    |
| <b>1L WSe<sub>2</sub></b><br>(on SiO <sub>2</sub> /Si)<br>(1.62, DB)             | CVD                       | 532 nm<br>V <sub>ds</sub> = 5 V                         | 3.717                 | 860        | UV-<br>Visible     | -                                        | Rigid                      | 8    |
| <b>FL GaS</b><br>(on SiO <sub>2</sub> /Si)<br>(3.05, IB)                         | CVD                       | 254 nm<br>V <sub>ds</sub> = 2 V                         | 4.2                   | 2050       | UV-<br>Visible     | 10 <sup>10</sup> --<br>10 <sup>14</sup>  | Rigid                      | 9    |
| <b>FL InSe</b><br>(on SiO <sub>2</sub> /Si)<br>(1.3, DB)                         | CVD                       | 450 nm<br>V <sub>ds</sub> = 10 V                        | 12.3                  | 3389       | Visible-<br>NIR    | 1.07*10 <sup>11</sup>                    | Rigid                      | 10   |
| <b>MoS<sub>2</sub>/h-BN</b><br>(on SiO <sub>2</sub> /Si)                         | Mechanical<br>exfoliation | 500 nm<br>V <sub>ds</sub> = 1.5 V                       | 5.07                  | 1200       | Visible            | 3*10 <sup>10</sup>                       | rigid                      | 11   |
| <b>ML In<sub>2</sub>Se<sub>3</sub></b><br>(on SiO <sub>2</sub> /Si)<br>(1.3, DB) | Mechanical<br>exfoliation | 300 nm<br>V <sub>ds</sub> = 5 V                         | 395                   | 163000     | UV-<br>Visible     | 2.26*10 <sup>12</sup>                    | Rigid                      | 12   |

|                                                                                    |         |                                          |              |              |                 |                             |                                  |             |
|------------------------------------------------------------------------------------|---------|------------------------------------------|--------------|--------------|-----------------|-----------------------------|----------------------------------|-------------|
| <b>FL In<sub>2</sub>Se<sub>3</sub></b><br>(on SiO <sub>2</sub> /Si)<br>(1.26, DB)  | epitaxy | Visible light<br>V <sub>ds</sub> = 0.1 V | 2.5          | -            | Visible         | -                           | Rigid                            | 13          |
| <b>ML In<sub>2</sub>Se<sub>3</sub></b><br>(on SiO <sub>2</sub> /Si)                | epitaxy | Visible light<br>V <sub>ds</sub> = 5 V   | 7.2          | -            | Visible         | -                           | Rigid                            | 14          |
| <b>FL Pb<sub>1-x</sub>Sn<sub>x</sub>Se</b><br>(on mica)<br>(0.43, -)               | CVD     | 473 nm<br>V <sub>ds</sub> = 2 V          | 5.95         | -            | UV-NIR          | -                           | Flexible                         | 15          |
| <b>FL InSe</b><br>(on PET)<br>(1.3, DB)                                            | CVD     | 633 nm<br>V <sub>ds</sub> = 10 V         | 3.9          | 764          | Visible-<br>NIR | 5.47*10 <sup>10</sup>       | Flexible                         | 10          |
| <b>FL GaS</b><br>(on PET)<br>(3.05, IB)                                            | CVD     | 254 nm<br>V <sub>ds</sub> = 2 V          | 19.2         | 9371         | UV              | -                           | Flexible                         | 9           |
| <b>FL GaTe</b><br>(on PET)<br>(1.7, DB)                                            | CVD     | 473 nm<br>V <sub>ds</sub> = 5 V          | 0.03         | 8            | UV-<br>Visible  | -                           | Flexible                         | 16          |
| <b>GaSe crystals</b><br>(on mica)<br>(2.1, IB)                                     | Epitaxy | white light<br>V <sub>ds</sub> = 10 V    | 0.03         | -            | Visible         | -                           | Flexible,<br>Transparent         | 17          |
| <b>ML In<sub>2</sub>Se<sub>3</sub></b><br>(on special PI)<br>(1.154, DB)           | PLD     | <b>532nm</b><br>V <sub>ds</sub> = 5 V    | <b>20.5</b>  | <b>4784</b>  | <b>UV-NIR</b>   | <b>6.02*10<sup>11</sup></b> | <b>Flexible,<br/>Transparent</b> | <b>ours</b> |
| <b>ML In<sub>2</sub>Se<sub>3</sub></b><br>(normal PI)<br>(1.154, DB)               | PLD     | <b>532nm</b><br>V <sub>ds</sub> = 5 V    | <b>45.2</b>  | <b>10558</b> | <b>UV-NIR</b>   | <b>1.6*10<sup>12</sup></b>  | <b>Flexible</b>                  | <b>ours</b> |
| <b>ML In<sub>2</sub>Se<sub>3</sub></b><br>(on sapphire)<br>(1154, DB)              | PLD     | <b>532nm</b><br>V <sub>ds</sub> = 5 V    | <b>27.9</b>  | <b>6525</b>  | <b>UV-NIR</b>   | <b>4.88*10<sup>11</sup></b> | <b>Transparent</b>               | <b>ours</b> |
| <b>ML In<sub>2</sub>Se<sub>3</sub></b><br>(on SiO <sub>2</sub> /Si)<br>(1.154, DB) | PLD     | <b>532nm</b><br>V <sub>ds</sub> = 5 V    | <b>22.96</b> | <b>5366</b>  | <b>UV-NIR</b>   | <b>5.13*10<sup>11</sup></b> | <b>Rigid</b>                     | <b>ours</b> |

DB and IB represent the direct and indirect band gaps, respectively. 1L, FL and ML mean monolayer, few-layer and multilayer, respectively.

**Figure S1.** Size distribution histogram of the as-prepared  $\text{In}_2\text{Se}_3$  film and corresponding Gaussian fitting curve of the grain size, which reveals that the average diameter of grain size of the as-prepared  $\text{In}_2\text{Se}_3$  film is 34.01 nm. SD represents standard deviation.

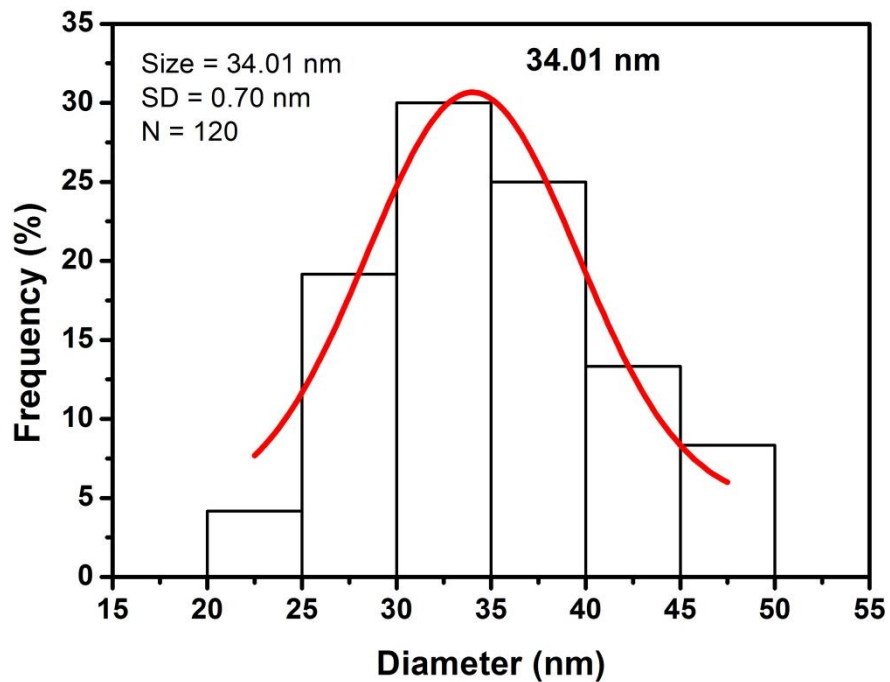

**Figure S2.** (a) Optical image of the  $\text{In}_2\text{Se}_3$  sample deposited on PI substrate, in which many scratches were made with a plastic sheet for AFM measurements. (b) AFM image at the edge of a scratch in (a). The corresponding height profiles along the red dotted line and blue dotted line are demonstrated in (c) and (d), respectively. The thickness of the  $\text{In}_2\text{Se}_3$  sample is deduced to be  $\sim 22.9$  nm.

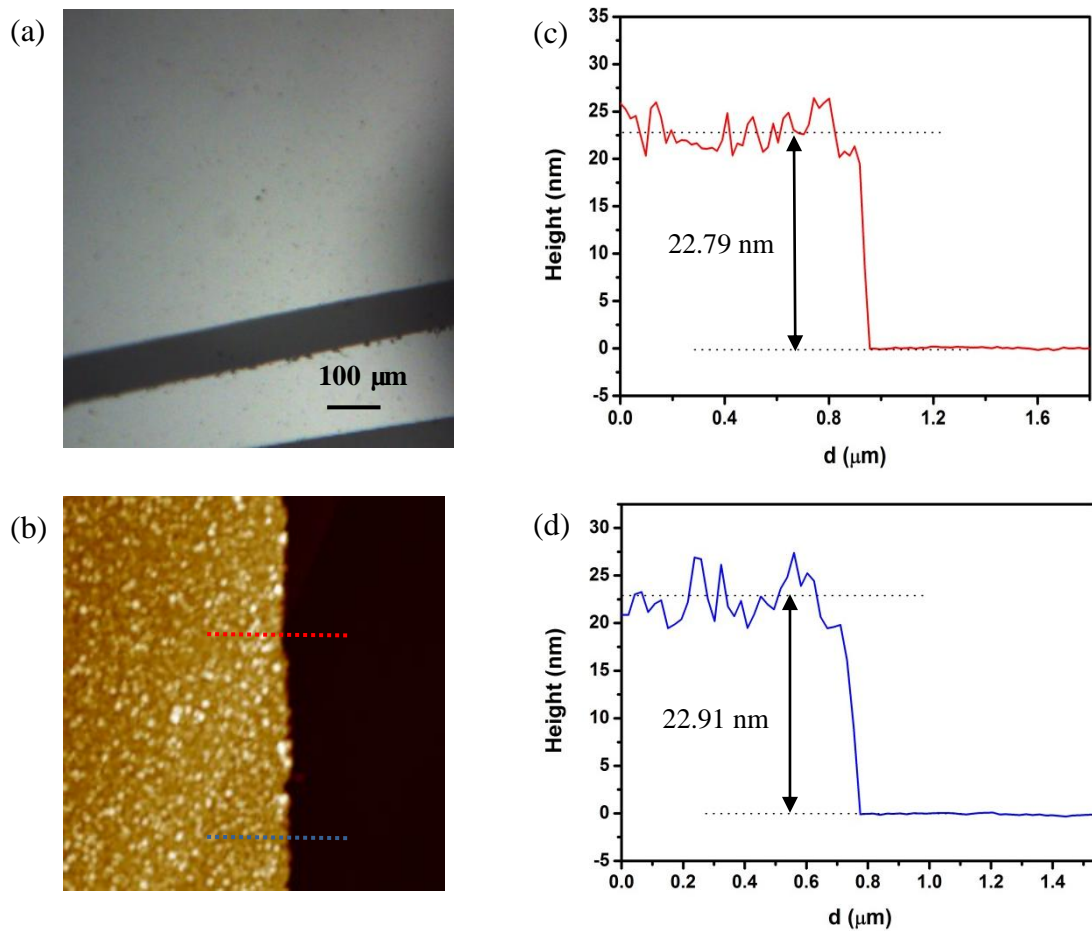

**Figure S3.** Raman spectrum of the as-prepared In<sub>2</sub>Se<sub>3</sub> film.

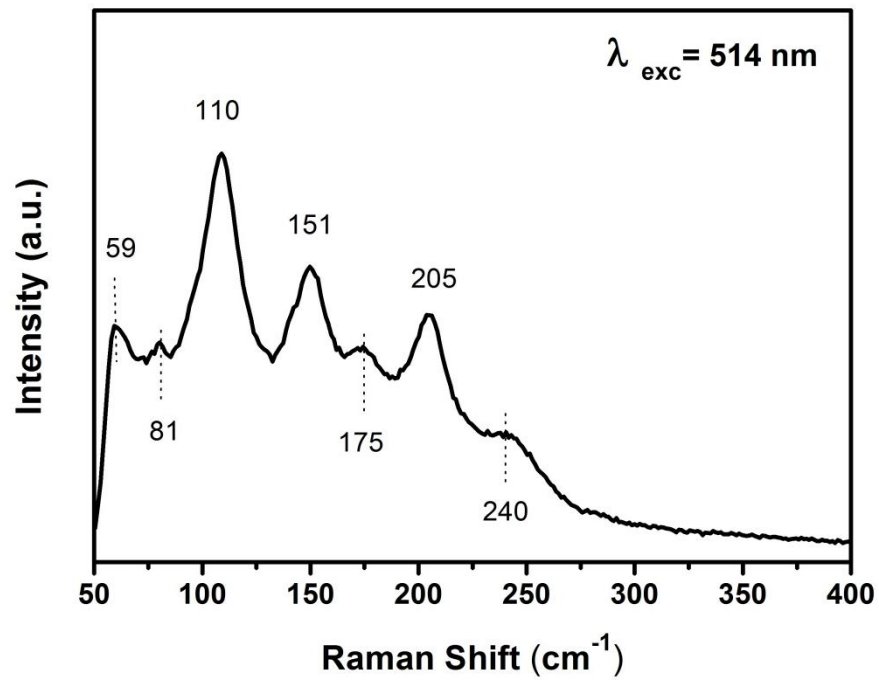

**Figure S4.** (a) UV-Vis-NIR diffuses reflectance absorption spectrum of the  $\text{In}_2\text{Se}_3$  film and (b) the corresponding Tauc plot, which presents a direct bandgap of 1.154 eV for the as-prepared  $\text{In}_2\text{Se}_3$  film.

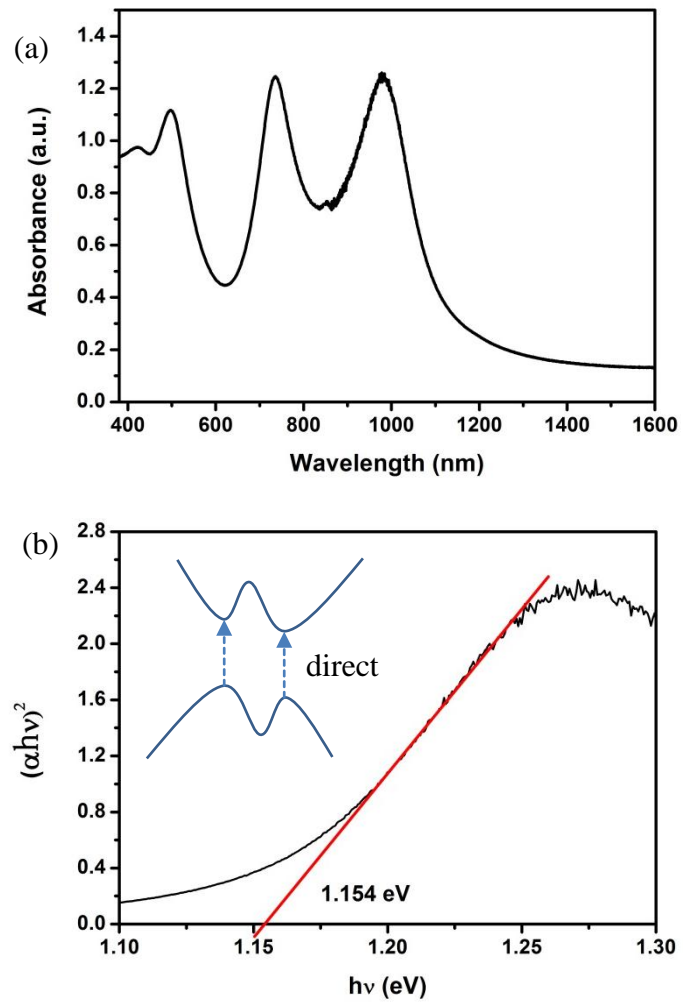

**Figure S5. Voltage dependence photoresponse at different bias voltages  $V_{ds}$ .** (a) Photocurrent under 532 nm light illumination with power density of  $20 \text{ mW/cm}^2$  as a function of bias voltage, showing a linear dependence on the bias voltage. (b) Time dependence switching behavior at different bias voltages  $V_{ds}$  from 0.2 to 5 V. Power density: 532 nm and  $20 \text{ mW/cm}^2$ . (c) The working principle of bias voltage dependence photoresponse.

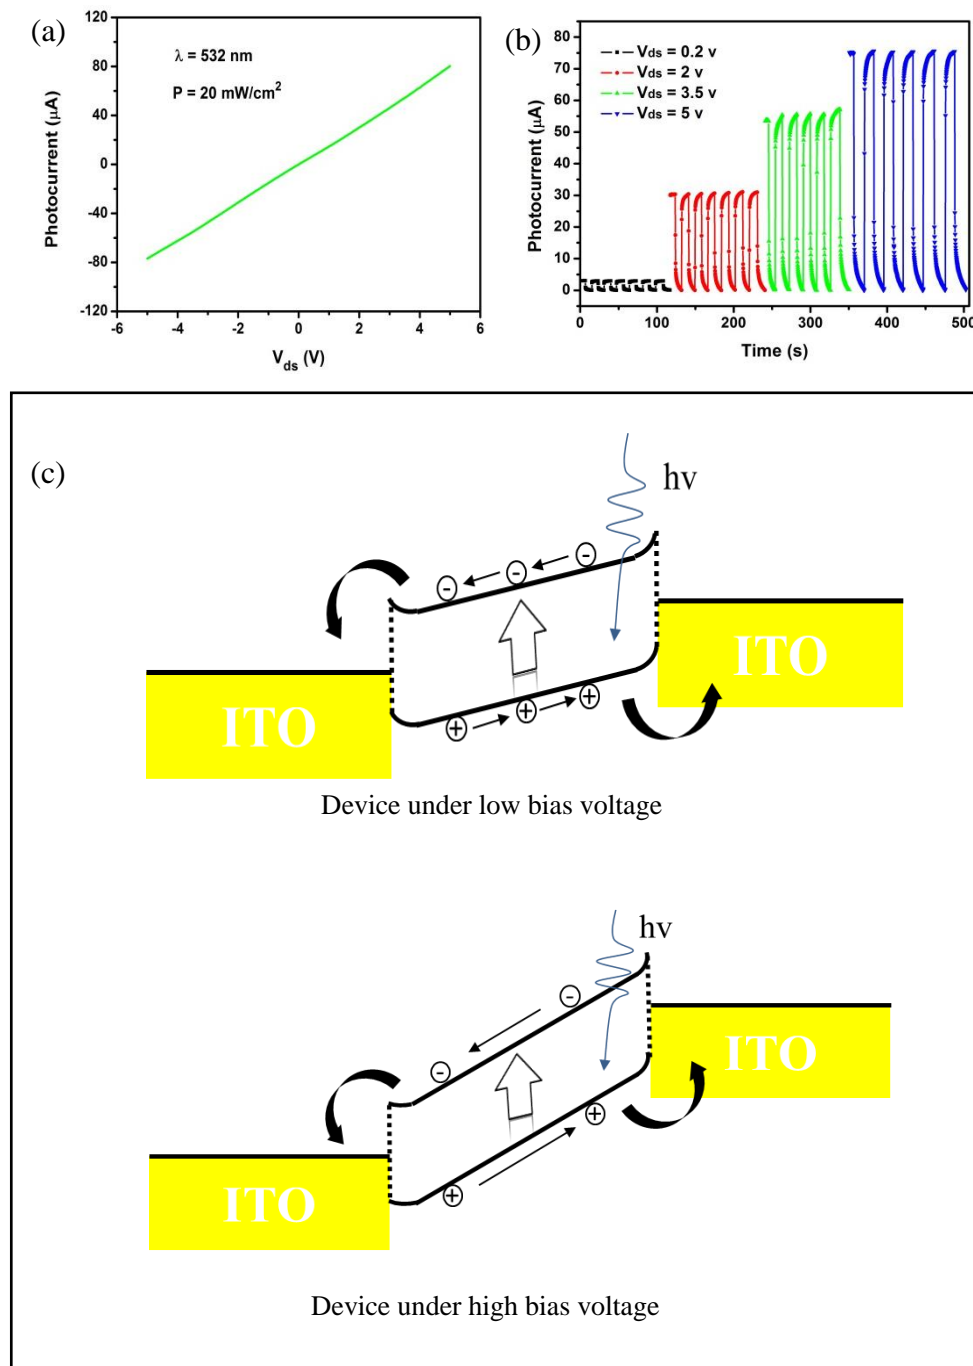



**Figure S6.** Transmittance and responsibility evolved with the thickness of the  $\text{In}_2\text{Se}_3$  active layer.

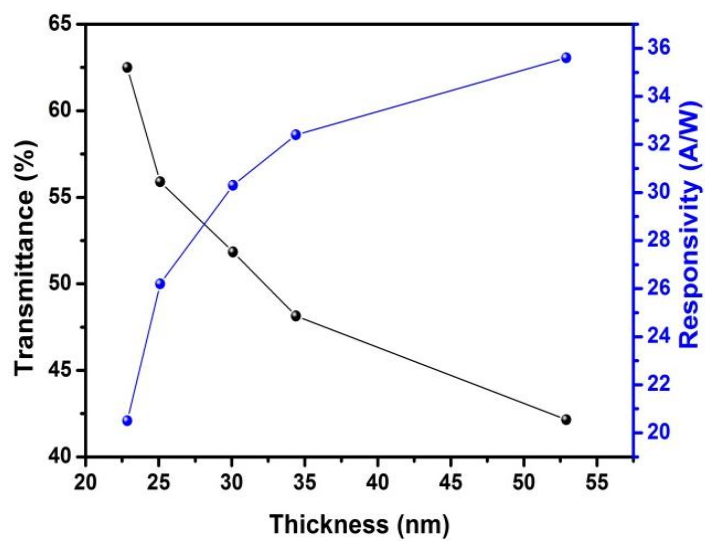

**Figure S7.** Photoswitching curves of the device before and after exposing to ambient environment for a month.

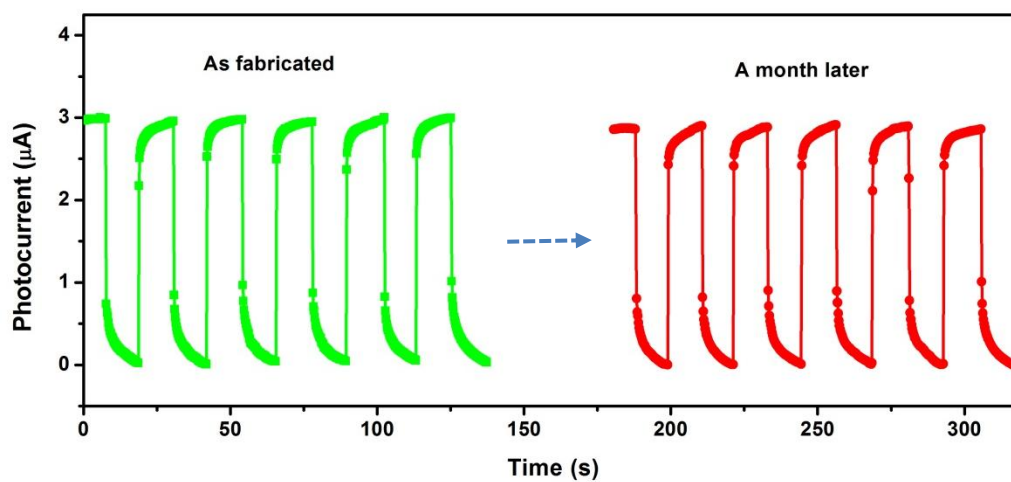

**Figure S8.** Greater details depict the transient current characteristic for this device: (a) rise, (b) decay. Here, the time interval between each point is 8.2 ms, and the rise/fall time was defined as the current increased/decreased from 0/100% to 80/20% of the stable current.

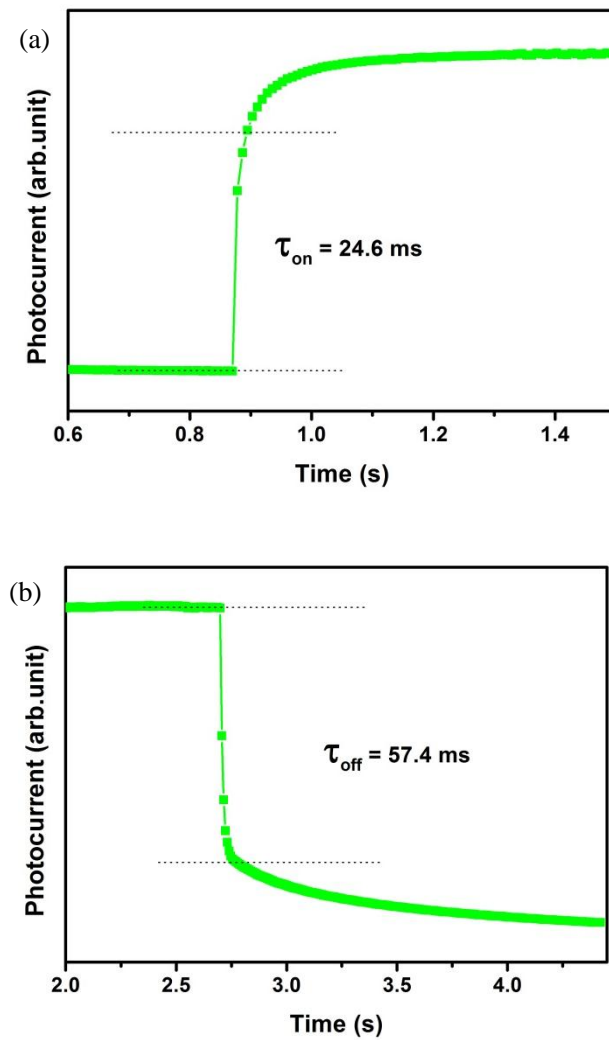

**Figure S9.** I-V curves of four contacts (left) indicating the successful contact of four electrodes on the  $\text{In}_2\text{Se}_3$  film. Final Hall results of the multilayer  $\text{In}_2\text{Se}_3$  film measured at room temperature (right) revealing an n-type behavior with mobility ( $\mu$ ) of  $76.8 \text{ cm}^2/\text{Vs}$ .

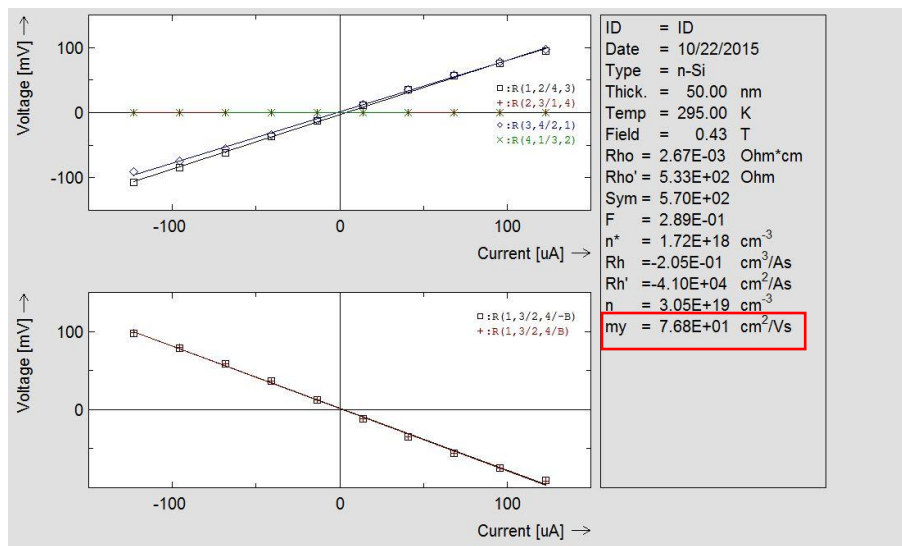

**Figure S10.** (a) I-V curves under ambient and vacuum conditions. Light power density: 20 mW/cm<sup>2</sup>. (b) Temporal photoresponse of the In<sub>2</sub>Se<sub>3</sub> device at V<sub>ds</sub> = 0.2 V.

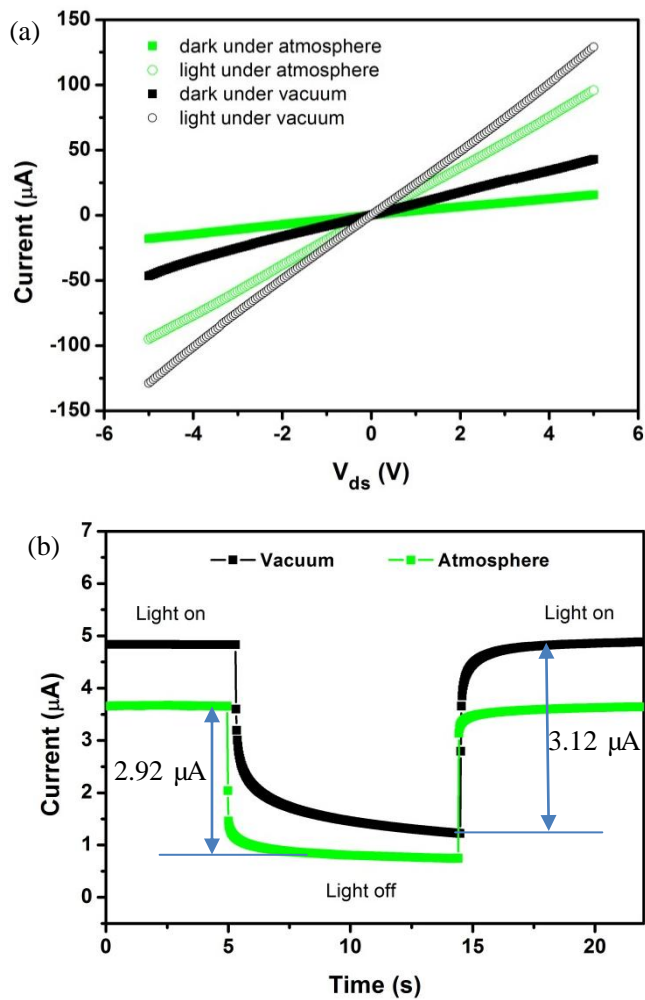

**Figure S11.** The  $\text{In}_2\text{Se}_3$  film deposited on the conventional  $\text{SiO}_2/\text{Si}$  substrate and its corresponding optoelectronic properties. (a) The optical images of the deposited  $\text{In}_2\text{Se}_3$  film (green part). (b) I-V characteristics of the  $\text{In}_2\text{Se}_3$  photodetector in the presence and absence of light ( $\lambda = 532 \text{ nm}$ , power density =  $20 \text{ mW/cm}^2$ ). (c) Time-dependent switching behavior of the photodetector under  $0.2 \text{ V}$  bias voltage. (d) Illumination intensity dependent photocurrent (black squares) and responsivity (blue squares) at  $V_{\text{ds}} = 5 \text{ V}$ . The power laws of  $I_{\text{ph}} \sim P^{0.453}$  was calculated from fitting the measured photocurrents.

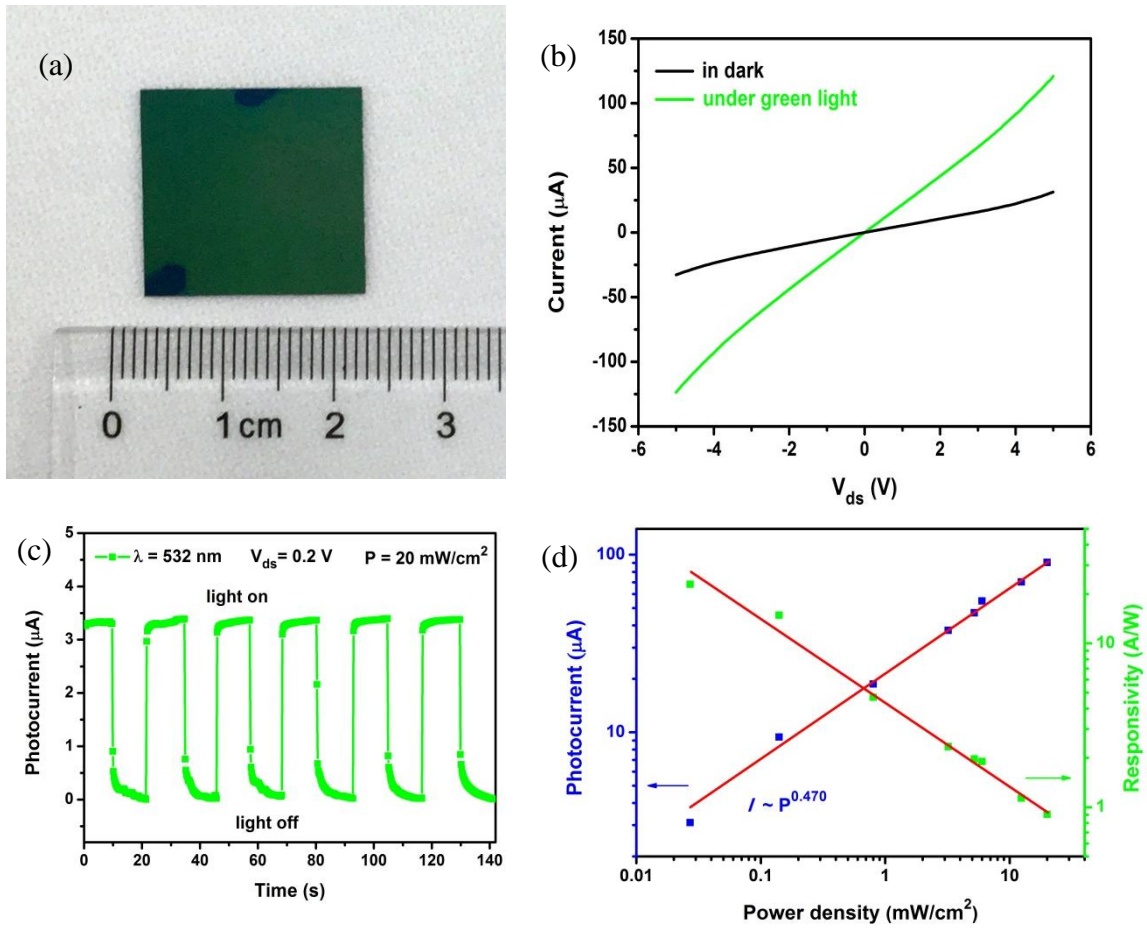

**Figure S12.** The  $\text{In}_2\text{Se}_3$  film deposited on the commercial PI substrate and its corresponding optoelectronic properties. (a) The optical images of the deposited  $\text{In}_2\text{Se}_3$  film (white part). The inset is in a flexed state. (b) I-V characteristics of the  $\text{In}_2\text{Se}_3$  photodetector in the presence and absence of light ( $\lambda = 532 \text{ nm}$ , power density  $= 20 \text{ mW/cm}^2$ ). (c) Time-dependent switching behavior of the photodetector under 0.2 V bias voltage. (d) Illumination intensity dependent photocurrent (black squares) and responsivity (blue squares) at  $V_{\text{ds}} = 5 \text{ V}$ . The power laws of  $I_{\text{ph}} \sim P^{0.471}$  was calculated from fitting the measured photocurrents.

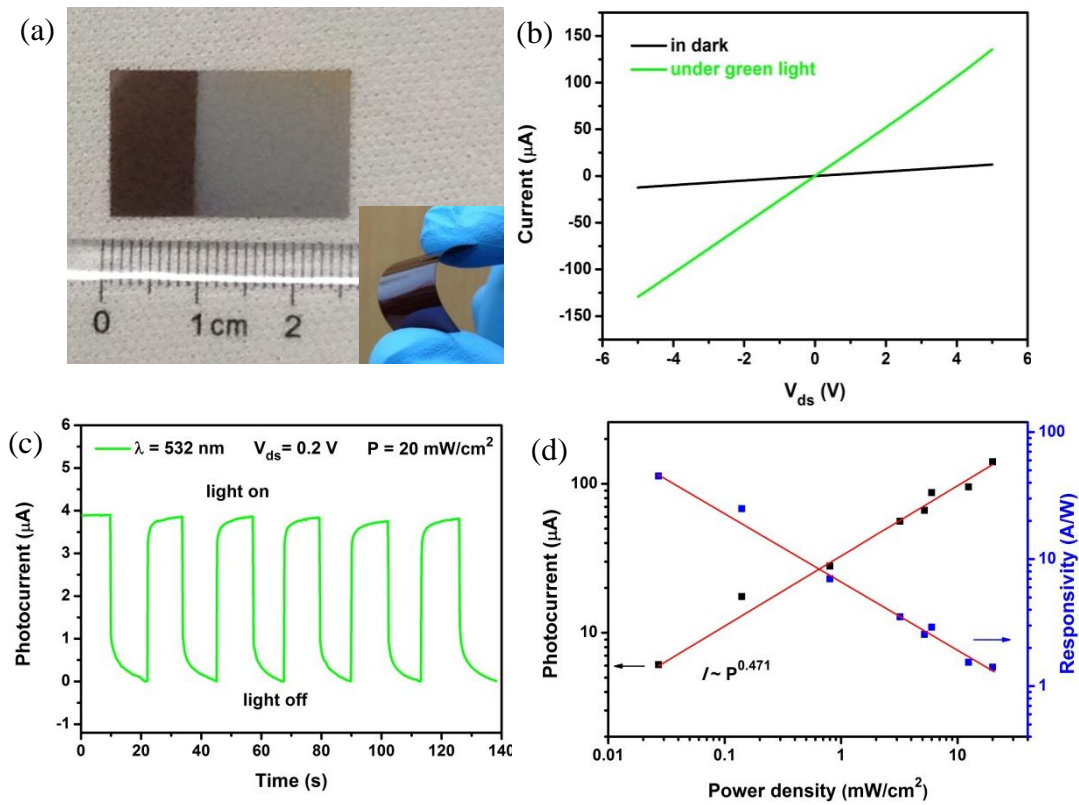

**Figure S13.** The  $\text{In}_2\text{Se}_3$  film deposited on transparent sapphire substrate and its corresponding optoelectronic properties. (a) The optical images of the deposited  $\text{In}_2\text{Se}_3$  film. Its transparency is revealed by the visibility of the flower placed beneath the transparent devices. (b) I-V characteristics of the  $\text{In}_2\text{Se}_3$  photodetector in the presence and absence of light ( $\lambda = 532 \text{ nm}$ , power density =  $20 \text{ mW/cm}^2$ ). (c) Time-dependent switching behavior of the photodetector under  $0.2 \text{ V}$  bias voltage. (d) Illumination intensity dependent photocurrent (black squares) and responsivity (blue squares) at  $V_{\text{ds}} = 5 \text{ V}$ . The power laws of  $I_{\text{ph}} \sim P^{0.453}$  was calculated from fitting the measured photocurrents.

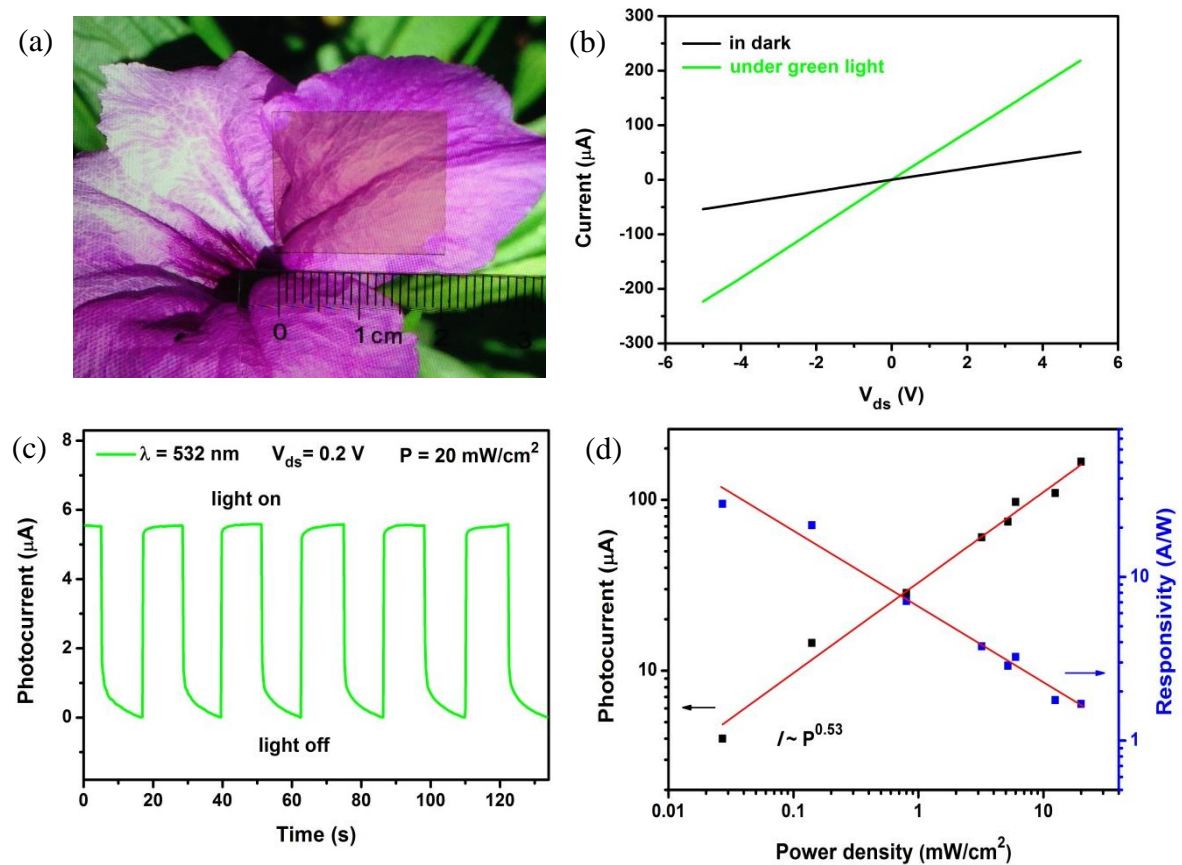

## References

1. S. H. Yu, Y. Lee, S. K. Jang, J. Kang, J. Jeon, C. Lee, J. Y. Lee, H. Kim, E. Hwang and S. Lee, *ACS Nano*, 2014, **8**, 8285-8291.
2. Z. Yin, H. Li, H. Li, L. Jiang, Y. Shi, Y. Sun, G. Lu, Q. Zhang, X. Chen and H. Zhang, *ACS Nano*, 2011, **6**, 74-80.
3. W. Choi, M. Y. Cho, A. Konar, J. H. Lee, G. B. Cha, S. C. Hong, S. Kim, J. Kim, D. Jena, J. Joo and S. Kim, *Adv. Mater.*, 2012, **24**, 5832-5836.
4. F. Xia, T. Mueller, Y. M. Lin, A. Valdes-Garcia and P. Avouris, *Nat. Nanotechnol.*, 2009, **4**, 839-843.
5. P. Hu, Z. Wen, L. Wang, P. Tan and K. Xiao, *ACS Nano*, 2012, **6**, 5988-5994.
6. J. D. Yao, Z. Q. Zheng, J. M. Shao and G. W. Yang, *Nanoscale*, 2015, **7**, 14974-14981.
7. J. Xia, X. Huang, L.-Z. Liu, M. Wang, L. Wang, B. Huang, D.-D. Zhu, J.-J. Li, C.-Z. Gu and X.-M. Meng, *Nanoscale*, 2014, **6**, 8949-8955.
8. J. Lu, A. Carvalho, X. K. Chan, H. Liu, B. Liu, E. S. Tok, K. P. Loh, A. H. Castro Neto and C. H. Sow, *Nano Lett.*, 2015, **15**, 3524-3532.
9. P. Hu, L. Wang, M. Yoon, J. Zhang, W. Feng, X. Wang, Z. Wen, J. C. Idrobo, Y. Miyamoto, D. B. Geohegan and K. Xiao, *Nano Lett.*, 2013, **13**, 1649-1654.
10. S. R. Tamalampudi, Y. Y. Lu, U. R. Kumar, R. Sankar, C. D. Liao, B. K. Moorthy, C. H. Cheng, F. C. Chou and Y. T. Chen, *Nano Lett.*, 2014, **14**, 2800-2806.
11. M. S. Choi, D. Qu, D. Lee, X. Liu, K. Watanabe, T. Taniguchi and W. J. Yoo, *ACS Nano*, 2014, **8**, 9332-9340.
12. R. B. Jacobs-Gedrim, M. Shanmugam, N. Jain, C. A. Durcan, M. T. Murphy, T. M. Murray, R. J. Matyi, R. L. Moore, 2nd and B. Yu, *ACS Nano*, 2014, **8**, 514-521.
13. M. Lin, D. Wu, Y. Zhou, W. Huang, W. Jiang, W. Zheng, S. Zhao, C. Jin, Y. Guo, H. Peng and Z. Liu, *J. Am. Chem. Soc.*, 2013, **135**, 13274-13277.
14. Q. L. Li, C. H. Liu, Y. T. Nie, W. H. Chen, X. Gao, X. H. Sun and S. D. Wang, *Nanoscale*, 2014, **6**, 14538-14542.
15. Q. Wang, K. Xu, Z. Wang, F. Wang, Y. Huang, M. Safdar, X. Zhan, F. Wang, Z. Cheng and J. He, *Nano Lett.*, 2015, **15**, 1183-1189.
16. Z. Wang, M. Safdar, M. Mirza, K. Xu, Q. Wang, Y. Huang, F. Wang, X. Zhan and J. He, *Nanoscale*, 2015, **7**, 7252-7258.
17. Y. Zhou, Y. Nie, Y. Liu, K. Yan, J. Hong, C. Jin, Y. Zhou, J. Yin, Z. Liu and H. Peng, *ACS Nano*, 2014, **8**, 1485-1490.
